# Supplementary material for: gwasrapidd: an R package to query, download and wrangle GWAS catalog data
Source: Oxford University Press journal article supplement (doi:10.1093/bioinformatics/btz605), 2019-08-01

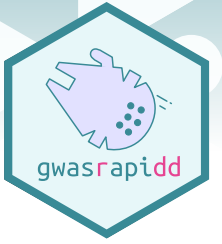

# GWAS Catalog access with gwasrapid

## Introduction

The **GWAS Catalog** is a service provided by the EMBL-EBI and NHGRI that offers a manually curated and freely available database of published genome-wide association studies (GWAS).

The GWAS Catalog data provided by the **RESTful API** is organized around four core entities:

- **studies**
- **associations**
- **variants**
- **traits**

## Get GWAS Catalog Entities

**gwasrapid** facilitates the access to the Catalog via the RESTful API, allowing you to programmatically retrieve data directly into R. Each of the four entities is mapped to an S4 object of a class of the same name.

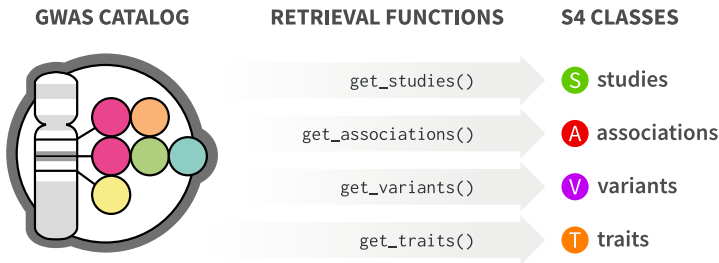

| Search by        | Example                                              | S | A | V | T |
|------------------|------------------------------------------------------|---|---|---|---|
| study_id         | "GCST000858"                                         | ● | ● | ● | ● |
| association_id   | "24300113"                                           | ● | ● | ● | ● |
| variant_id       | "rs12752552"                                         | ● | ● | ● | ● |
| efo_id           | "EFO_0005543"                                        | ● | ● | ● | ● |
| pubmed_id        | "21626137"                                           | ● | ● | ● | ● |
| user_requested   | TRUE                                                 | ● | ● | ● | ● |
| full_pvalue_set  | FALSE                                                | ● | ● | ● | ● |
| efo_uri          | "http://www.ebi.ac.uk/efo/EFO_0004761"               | ● | ● | ● | ● |
| genomic_range    | list(chromosome = "22", start = 1L, end = 15473564L) | ● | ● | ● | ● |
| gene_name        | "BRCA1"                                              | ● | ● | ● | ● |
| efo_trait        | "lung adenocarcinoma"                                | ● | ● | ● | ● |
| reported_trait   | "Breast cancer"                                      | ● | ● | ● | ● |
| cytogenetic_band | "1p36.33"                                            | ● | ● | ● | ● |

## S4 Representation of GWAS Catalog Entities

### S4 class studies

The **studies** object consists of eight slots, each a table (tibble). Each study is an observation (row) in the studies table — main table. All tables have the column study\_id as primary key.

For details about the studies S4 class: `class?studies`.

|                                                                                                                                                                                                                                                                                                                                                             |                                                                                                                                                                                                                                                                                                                                                                                                                                                                                                            |                                                                                                                                                                                                                                                                                                                                                                                                                                                                                                                                                                             |
|-------------------------------------------------------------------------------------------------------------------------------------------------------------------------------------------------------------------------------------------------------------------------------------------------------------------------------------------------------------|------------------------------------------------------------------------------------------------------------------------------------------------------------------------------------------------------------------------------------------------------------------------------------------------------------------------------------------------------------------------------------------------------------------------------------------------------------------------------------------------------------|-----------------------------------------------------------------------------------------------------------------------------------------------------------------------------------------------------------------------------------------------------------------------------------------------------------------------------------------------------------------------------------------------------------------------------------------------------------------------------------------------------------------------------------------------------------------------------|
| <b>studies</b> <ul style="list-style-type: none"><li>• study_id</li><li>• reported_trait</li><li>• initial_sample_size</li><li>• replication_sample_size</li><li>• gxe</li><li>• gxg</li><li>• snp_count</li><li>• qualifier</li><li>• imputed</li><li>• pooled</li><li>• study_design_comment</li><li>• full_pvalue_set</li><li>• user_requested</li></ul> | <b>genotyping_techs</b> <ul style="list-style-type: none"><li>• study_id</li><li>• genotyping technology</li></ul> <b>platforms</b> <ul style="list-style-type: none"><li>• study_id</li><li>• manufacturer</li></ul> <b>ancestries</b> <ul style="list-style-type: none"><li>• study_id</li><li>• ancestry_id</li><li>• type</li><li>• number_of_individuals</li></ul> <b>ancestral_groups</b> <ul style="list-style-type: none"><li>• study_id</li><li>• ancestry_id</li><li>• ancestral_group</li></ul> | <b>countries_of_recruitment</b> <ul style="list-style-type: none"><li>• study_id</li><li>• ancestry_id</li><li>• country_name</li><li>• major_area</li><li>• region</li></ul> <b>countries_of_origin</b> <ul style="list-style-type: none"><li>• study_id</li><li>• ancestry_id</li><li>• country_name</li><li>• major_area</li><li>• region</li></ul> <b>publications</b> <ul style="list-style-type: none"><li>• study_id</li><li>• pubmed_id</li><li>• publication_date</li><li>• publication</li><li>• title</li><li>• author_fullname</li><li>• author_orcid</li></ul> |
|-------------------------------------------------------------------------------------------------------------------------------------------------------------------------------------------------------------------------------------------------------------------------------------------------------------------------------------------------------------|------------------------------------------------------------------------------------------------------------------------------------------------------------------------------------------------------------------------------------------------------------------------------------------------------------------------------------------------------------------------------------------------------------------------------------------------------------------------------------------------------------|-----------------------------------------------------------------------------------------------------------------------------------------------------------------------------------------------------------------------------------------------------------------------------------------------------------------------------------------------------------------------------------------------------------------------------------------------------------------------------------------------------------------------------------------------------------------------------|

### S4 class associations

The **associations** object consists of six slots, each a table (tibble). Each association is an observation (row) in the associations table — main table. All tables have the column association\_id as primary key.

For details about the associations S4 class: `class?associations`.

|                                                                                                                                                                                                                                                                                                                                                                                                                                     |                                                                                                                                                                                                                                                                                                                                                                              |                                                                                                                                                                                                                                                                                                                                                                                                                    |
|-------------------------------------------------------------------------------------------------------------------------------------------------------------------------------------------------------------------------------------------------------------------------------------------------------------------------------------------------------------------------------------------------------------------------------------|------------------------------------------------------------------------------------------------------------------------------------------------------------------------------------------------------------------------------------------------------------------------------------------------------------------------------------------------------------------------------|--------------------------------------------------------------------------------------------------------------------------------------------------------------------------------------------------------------------------------------------------------------------------------------------------------------------------------------------------------------------------------------------------------------------|
| <b>associations</b> <ul style="list-style-type: none"><li>• association_id</li><li>• pvalue</li><li>• pvalue_description</li><li>• pvalue_mantissa</li><li>• pvalue_exponent</li><li>• multiple_snp_haplotype</li><li>• snp_interaction</li><li>• or_per_copy_number</li><li>• beta_number</li><li>• beta_unit</li><li>• beta_direction</li><li>• beta_description</li><li>• last_mapping_date</li><li>• last_update_date</li></ul> | <b>loci</b> <ul style="list-style-type: none"><li>• association_id</li><li>• locus_id</li><li>• haplotype_snp_count</li><li>• description</li></ul> <b>risk_alleles</b> <ul style="list-style-type: none"><li>• association_id</li><li>• locus_id</li><li>• variant_id</li><li>• risk_allele</li><li>• risk_frequency</li><li>• genome_wide</li><li>• limited_list</li></ul> | <b>genes</b> <ul style="list-style-type: none"><li>• association_id</li><li>• locus_id</li><li>• gene_name</li></ul> <b>ensembl_ids</b> <ul style="list-style-type: none"><li>• association_id</li><li>• locus_id</li><li>• gene_name</li><li>• ensembl_id</li></ul> <b>entrez_ids</b> <ul style="list-style-type: none"><li>• association_id</li><li>• locus_id</li><li>• gene_name</li><li>• entrez_id</li></ul> |
|-------------------------------------------------------------------------------------------------------------------------------------------------------------------------------------------------------------------------------------------------------------------------------------------------------------------------------------------------------------------------------------------------------------------------------------|------------------------------------------------------------------------------------------------------------------------------------------------------------------------------------------------------------------------------------------------------------------------------------------------------------------------------------------------------------------------------|--------------------------------------------------------------------------------------------------------------------------------------------------------------------------------------------------------------------------------------------------------------------------------------------------------------------------------------------------------------------------------------------------------------------|

### S4 class variants

The **variants** object consists of four slots, each a table (tibble). Each variant is an observation (row) in the variants table — main table. All tables have the column variant\_id as primary key.

For details about the variants S4 class: `class?variants`.

|                                                                                                                                                                                                                                         |                                                                                                                                                                                                                                                                                                                                                        |                                                                                                                                                                                                                                                 |
|-----------------------------------------------------------------------------------------------------------------------------------------------------------------------------------------------------------------------------------------|--------------------------------------------------------------------------------------------------------------------------------------------------------------------------------------------------------------------------------------------------------------------------------------------------------------------------------------------------------|-------------------------------------------------------------------------------------------------------------------------------------------------------------------------------------------------------------------------------------------------|
| <b>variants</b> <ul style="list-style-type: none"><li>• variant_id</li><li>• merged</li><li>• functional_class</li><li>• chromosome_name</li><li>• chromosome_position</li><li>• chromosome_region</li><li>• last_update_date</li></ul> | <b>genomic_contexts</b> <ul style="list-style-type: none"><li>• variant_id</li><li>• gene_name</li><li>• chromosome_name</li><li>• chromosome_position</li><li>• is_mapped_gene</li><li>• distance</li><li>• is_closest_gene</li><li>• is_intergenic</li><li>• is_upstream</li><li>• is_downstream</li><li>• source</li><li>• mapping_method</li></ul> | <b>ensembl_ids</b> <ul style="list-style-type: none"><li>• variant_id</li><li>• gene_name</li><li>• ensembl_id</li></ul> <b>entrez_ids</b> <ul style="list-style-type: none"><li>• variant_id</li><li>• gene_name</li><li>• entrez_id</li></ul> |
|-----------------------------------------------------------------------------------------------------------------------------------------------------------------------------------------------------------------------------------------|--------------------------------------------------------------------------------------------------------------------------------------------------------------------------------------------------------------------------------------------------------------------------------------------------------------------------------------------------------|-------------------------------------------------------------------------------------------------------------------------------------------------------------------------------------------------------------------------------------------------|

### S4 class traits

The **traits** object consists of one slot only, a table (tibble) of GWAS Catalog EFO traits. Each EFO trait is an observation (row) in the traits table — main table.

For details about the traits S4 class: `class?traits`.

|                                                                                                      |
|------------------------------------------------------------------------------------------------------|
| <b>traits</b> <ul style="list-style-type: none"><li>• efo_id</li><li>• trait</li><li>• uri</li></ul> |
|------------------------------------------------------------------------------------------------------|

## Manipulate Cases

Get a **studies** object `s` of two GWAS studies:

```
s <- get_studies(study_id = c('a', 'b'))
```

Subset object `s` by either identifier or position using ``[``:

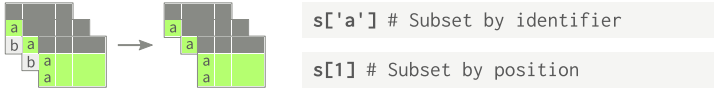

Combine two studies' objects:

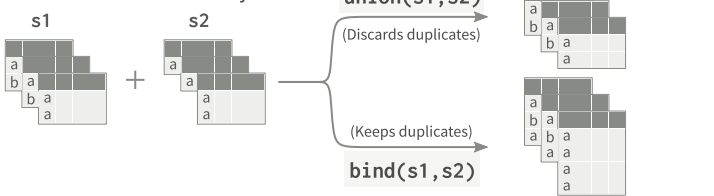

Supplement: btz605_supplementary_data.zip [file btz605_supplementary_data.zip]
