# Supplementary material for: gwasrapidd: an R package to query, download and wrangle GWAS catalog data
Source: Oxford University Press journal article supplement (doi:10.1093/bioinformatics/btz605), 2019-08-01
Supplement: btz605_supplementary_data.zip [file btz605_supplementary_data.zip]

**Table S1** | GWAS Catalog REST API URL endpoints. A JSON response can be embedded (E) or not (E), and paginated (P) or not (P). Full squares indicate that GWAS Catalog entities are retrievable by the search criterion, whereas outlined squares indicate otherwise. URL endpoints are shortened, i.e., the common prefix `https://www.ebi.ac.uk/gwas/rest/api/` is omitted for clarity.
