# Supplementary material for: gwasrapidd: an R package to query, download and wrangle GWAS catalog data
Source: Oxford University Press journal article supplement (doi:10.1093/bioinformatics/btz605), 2019-08-01
Supplement: btz605_supplementary_data.zip [file btz605_supplementary_data.zip]

**A**

| studies                                                                                                                                                                                                                                                                                                                          | genotyping_techs                                                                                                                                                                           | countries_of_recruitment                                                                                                                  |
|----------------------------------------------------------------------------------------------------------------------------------------------------------------------------------------------------------------------------------------------------------------------------------------------------------------------------------|--------------------------------------------------------------------------------------------------------------------------------------------------------------------------------------------|-------------------------------------------------------------------------------------------------------------------------------------------|
| <ul style="list-style-type: none"> <li>study_id</li> <li>reported_trait</li> <li>initial_sample_size</li> <li>replication_sample_size</li> <li>gxe</li> <li>gxc</li> <li>snp_count</li> <li>qualifier</li> <li>imputed</li> <li>pooled</li> <li>study_design_comment</li> <li>full_pvalue_set</li> <li>user_requested</li> </ul> | <ul style="list-style-type: none"> <li>study_id</li> <li>genotyping technology</li> </ul>                                                                                                  | <ul style="list-style-type: none"> <li>study_id</li> <li>ancestry_id</li> <li>country_name</li> <li>major_area</li> <li>region</li> </ul> |
| platforms                                                                                                                                                                                                                                                                                                                        | ancestries                                                                                                                                                                                 | countries_of_origin                                                                                                                       |
| <ul style="list-style-type: none"> <li>study_id</li> <li>manufacturer</li> </ul>                                                                                                                                                                                                                                                 | <ul style="list-style-type: none"> <li>study_id</li> <li>ancestry_id</li> <li>country_name</li> <li>major_area</li> <li>region</li> </ul>                                                  | <ul style="list-style-type: none"> <li>study_id</li> <li>ancestry_id</li> <li>country_name</li> <li>major_area</li> <li>region</li> </ul> |
| ancestral_groups                                                                                                                                                                                                                                                                                                                 | publications                                                                                                                                                                               |                                                                                                                                           |
| <ul style="list-style-type: none"> <li>study_id</li> <li>ancestry_id</li> <li>ancestral_group</li> </ul>                                                                                                                                                                                                                         | <ul style="list-style-type: none"> <li>study_id</li> <li>pubmed_id</li> <li>publication_date</li> <li>publication</li> <li>title</li> <li>author_fullname</li> <li>author_orcid</li> </ul> |                                                                                                                                           |

**C**

| variants                                                                                                                                                                                                          | genomic_contexts                                                                                                                                                                                                                                                                            | ensembl_ids                                                                                         |
|-------------------------------------------------------------------------------------------------------------------------------------------------------------------------------------------------------------------|---------------------------------------------------------------------------------------------------------------------------------------------------------------------------------------------------------------------------------------------------------------------------------------------|-----------------------------------------------------------------------------------------------------|
| <ul style="list-style-type: none"> <li>variant_id</li> <li>merged</li> <li>functional_class</li> <li>chromosome_name</li> <li>chromosome_position</li> <li>chromosome_region</li> <li>last_update_date</li> </ul> | <ul style="list-style-type: none"> <li>variant_id</li> <li>gene_name</li> <li>chromosome_name</li> <li>chromosome_position</li> <li>distance</li> <li>is_closest_gene</li> <li>is_intergenic</li> <li>is_upstream</li> <li>is_downstream</li> <li>source</li> <li>mapping_method</li> </ul> | <ul style="list-style-type: none"> <li>variant_id</li> <li>gene_name</li> <li>ensembl_id</li> </ul> |
|                                                                                                                                                                                                                   | entrez_ids                                                                                                                                                                                                                                                                                  |                                                                                                     |
|                                                                                                                                                                                                                   | <ul style="list-style-type: none"> <li>variant_id</li> <li>gene_name</li> <li>entrez_id</li> </ul>                                                                                                                                                                                          |                                                                                                     |

**B**

| associations                                                                                                                                                                                                                                                                                                                                                                                                                                                | loci                                                                                                                                                                                           | genes                                                                                                                     |
|-------------------------------------------------------------------------------------------------------------------------------------------------------------------------------------------------------------------------------------------------------------------------------------------------------------------------------------------------------------------------------------------------------------------------------------------------------------|------------------------------------------------------------------------------------------------------------------------------------------------------------------------------------------------|---------------------------------------------------------------------------------------------------------------------------|
| <ul style="list-style-type: none"> <li>association_id</li> <li>pvalue</li> <li>pvalue_description</li> <li>pvalue_mantissa</li> <li>pvalue_exponent</li> <li>multiple_snp_haplotype</li> <li>snp_interaction</li> <li>snp_type</li> <li>standard_error</li> <li>range</li> <li>or_per_copy_number</li> <li>beta_number</li> <li>beta_unit</li> <li>beta_direction</li> <li>beta_description</li> <li>last_mapping_date</li> <li>last_update_date</li> </ul> | <ul style="list-style-type: none"> <li>association_id</li> <li>locus_id</li> <li>haplotype_snp_count</li> <li>description</li> </ul>                                                           | <ul style="list-style-type: none"> <li>association_id</li> <li>locus_id</li> <li>gene_name</li> </ul>                     |
|                                                                                                                                                                                                                                                                                                                                                                                                                                                             | risk_alleles                                                                                                                                                                                   | ensembl_ids                                                                                                               |
|                                                                                                                                                                                                                                                                                                                                                                                                                                                             | <ul style="list-style-type: none"> <li>association_id</li> <li>locus_id</li> <li>variant_id</li> <li>risk_allele</li> <li>risk_frequency</li> <li>genome_wide</li> <li>limited_list</li> </ul> | <ul style="list-style-type: none"> <li>association_id</li> <li>locus_id</li> <li>gene_name</li> <li>ensembl_id</li> </ul> |
|                                                                                                                                                                                                                                                                                                                                                                                                                                                             |                                                                                                                                                                                                | entrez_ids                                                                                                                |
|                                                                                                                                                                                                                                                                                                                                                                                                                                                             |                                                                                                                                                                                                | <ul style="list-style-type: none"> <li>association_id</li> <li>locus_id</li> <li>gene_name</li> <li>entrez_id</li> </ul>  |

**D**

| traits                                                                               |
|--------------------------------------------------------------------------------------|
| <ul style="list-style-type: none"> <li>efo_id</li> <li>trait</li> <li>uri</li> </ul> |

**Figure S1** | S4 representation of studies, associations, variants and traits. **(A)** S4 studies object, comprising 8 slots, i.e., 8 tables: studies, genotyping\_techs, platforms, ancestries, ancestral\_groups, countries\_of\_recruitment, countries\_of\_origin and publications. All tables share the primary key study\_id. **(B)** S4 associations object, comprising 6 slots, i.e., 6 tables: associations, loci, risk\_alleles, genes, ensembl\_ids and entrez\_ids. All tables share the primary key association\_id. **(C)** S4 variants object, comprising 4 slots, i.e., 4 tables: variants, genomic\_contexts, ensembl\_ids and entrez\_ids. All tables share the primary key variant\_id. **(D)** S4 traits object, with one slot, i.e., one single tables: traits. The traits has the primary key efo\_id.
